# Supplementary material
Source: publisher figshare collection journal article supplement (https://frontiersin.figshare.com/ndownloader/files/23203316)
Supplement: Supplementary file [file 23203316]

## Supplementary Material

### 1 SUPPLEMENTARY FIGURES

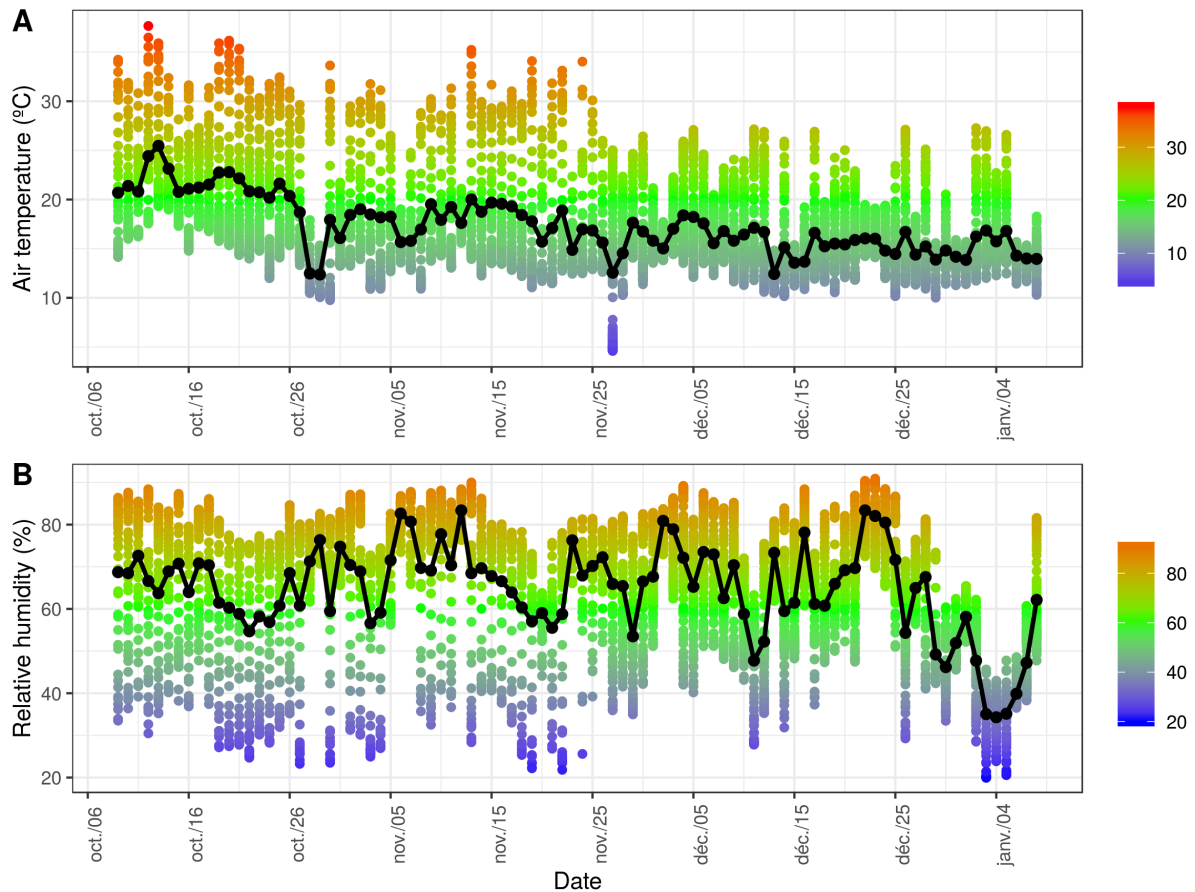

**Figure S1.** Plant growth conditions in the greenhouse. Air temperature (A) and relative humidity (B) during the experiment. For each measurement mean is shown in black line.
